# Supplementary material for: Unraveling the Potential Role of Tecomella undulata in Experimental NASH
Source: MDPI journal article supplement (doi:10.3390/ijms24043244), 2023-02-07
Supplement: s1 [file s1]

**Supplementary Figure S1. Study design to evaluate the efficacy of *Tecomella undulata* (TU) in the treatment of NASH.**

**Supplementary Figure S2. Cell viability after treatment with *Tecomella undulata* (TU) in Huh7 and HepG2 cells.** WTS-1 assay were performed to assess the cellular cytotoxicity of *Tecomella undulata*. Various concentrations of *Tecomella undulata* (10-1000  $\mu$ M) were treated to HepG2 and Huh7 cells for 24 hours. Based on the cell viability, cells were further treated with 50 $\mu$ M or 100  $\mu$ M for 24, 48 and 72 hours. Percent cell viability was calculated in comparison to the control (no treatment).

**Supplementary Figure S3.** Representative photographs (A) and gross anatomy of liver (B) from mice fed with CDNW and WDSW treated with or without *Tecomella undulata* (TU), showing discrepancy in body size, and liver morphology and size. Vehicle control (VC), Saroglitazar (SARO).

**Supplementary Figure S4. Effect of *Tecomella undulata* (TU) on bodyweight, liver weight, and insulin sensitivity on CDNW mice.** Mice were treated with CDNW with vehicle control (VC), Saroglitazar (SARO) or *Tecomella undulata* (TU) via oral gavage for 24 weeks. At the completion of the treatment, body weights (A), and liver weight (B) were measured. Mice were fasted overnight and blood glucose concentration (mg/dl) was measured after intraperitoneal injection of 1g/kg glucose (C). Mice fasted for 4-5 hours were administered 0.75 units/kg insulin and blood glucose concentration (mg/dl) measured (D). The bar graphs depict the area under curve (AUC) with or without treatment. Data are expressed as mean with SEM for 8-10 mice per group.

**Supplementary Figure S5. *Tecomella undulata* (TU) treatment has no effect on fasting glucose and insulin.** Mice were treated with CDNW with vehicle control (VC), Saroglitazar (SARO) or *Tecomella undulata* (TU) via oral gavage for 24 weeks. At the completion of the treatment, fasting glucose (A), and fasting insulin (B) were measured. HOMA-IR (C) was calculated using the formula: (fasting insulin (milliunits/liter) $\times$ fasting glucose (mmol/liter))/22.5. Data are expressed as mean with SEM for 8-10 mice per group.

**Supplementary Figure S6. Effect of *Tecomella undulata* (TU) treatment on liver enzymes and lipid profile in mice fed with CDNW.** Serum biochemical analyses were performed on CDNW mice treated with vehicle control (VC), Saroglitazar (SARO) or *Tecomella undulata* (TU) for 24 weeks. Mice were fasted overnight and blood was collected. (A) ALT, (B) ALT, (C) triglycerides, (D) cholesterol, and (E) serum LDL-C. Data are expressed as the mean with SEM for 8–10 mice per group. AST, aspartate aminotransferase; ALT, alanine aminotransferase; LDL-C, low-density lipoprotein-Cholesterol.

**Supplementary Table S1. Results of Pharmacopeia analysis on *Tecomella undulata* (TU) stem bark powder sample.**
