# Supplementary material for: Unraveling the Potential Role of Tecomella undulata in Experimental NASH
Source: MDPI journal article supplement (doi:10.3390/ijms24043244), 2023-02-07
Supplement: s1 [file s1]

**Supplementary Table S1: Results of Pharmacopeia analysis**

| Sl. No. | Test                                              | Unit   | Result               | Ayurvedic Pharmacopoeia of India | Test Method                                          |
|---------|---------------------------------------------------|--------|----------------------|----------------------------------|------------------------------------------------------|
|         | <b>Physiochemical</b>                             |        |                      |                                  |                                                      |
| 1       | Color                                             | -      | Brown color powder   | Brown color                      | GCAS/FC/SOP/I7.2-G                                   |
| 2       | Odor                                              | -      | Characteristic odor  | Indistinct odor                  |                                                      |
| 3       | Taste                                             | -      | Characteristic taste | Indistinct Taste                 |                                                      |
| 4       | Total Ash                                         | %      | 6.64                 | 12.0 max                         | IS 3077:1992                                         |
| 5       | Acid insoluble Ash                                | %      | 0.34                 | 1.0 max                          |                                                      |
| 6       | Water soluble extractive                          | %      | 19.27                | 10.0 max                         |                                                      |
| 7       | Alcohol soluble extractive                        | %      | 18.83                | 15.0 max                         |                                                      |
|         | <b>Residue - Metals</b>                           |        |                      |                                  |                                                      |
| 1       | Lead as Pb                                        | mg/kg  | BDL (DL: 0.01)       | 10 max                           | GCAS/FC/SOP-21-M                                     |
| 2       | Cadmium as Cd                                     | mg/kg  | BDL (DL: 0.01)       | 0.3 max                          |                                                      |
| 3       | Mercury as Hg                                     | mg/kg  | BDL (DL: 0.01)       | 1.0 max                          |                                                      |
| 4       | Arsenic as As                                     | mg/kg  | BDL (DL: 0.01)       | 3.0 max                          |                                                      |
|         | <b>Biological</b>                                 |        |                      |                                  |                                                      |
| 1       | Total Bacterial count                             | Cfu/g  | 65x10 <sup>2</sup>   | <10 <sup>5</sup>                 | IS 5402:2012 RA 2018                                 |
| 2       | Yeast and Mold count                              | Cfu/g  | 20x10 <sup>1</sup>   | <10 <sup>3</sup>                 | IS 5403:1999 RA 2018                                 |
| 3       | Enetrobacteriaceae                                | Cfu/g  | <10                  | Not Specified                    | IS 17112 (P-2):2019                                  |
|         | <b>Toxins</b>                                     |        |                      |                                  |                                                      |
| 1       | Total Aflatoxins (B1, B2, G1, G2)                 | µg/ kg | BDL (DL: 2.5)        | <5.0                             | FSSAI manual methods - Mycotoxin                     |
|         | <b>Residue - Pesticides</b>                       |        |                      |                                  |                                                      |
| 1       | Alachlor                                          | mg/kg  | BDL (DL: 0.01)       | 0.02 max                         | AOAC 18 <sup>th</sup> Edition: 2005, 990.06 & 991.07 |
| 2       | Atrazine                                          | mg/kg  | BDL (DL: 0.01)       | Not Specified                    |                                                      |
| 3       | Aldrin/Dieldrin                                   | mg/kg  | BDL (DL: 0.01)       | 0.05 max                         |                                                      |
| 4       | Alpha HCH                                         | mg/kg  | BDL (DL: 0.01)       | 0.3 max                          |                                                      |
| 5       | Beta HCH                                          | mg/kg  | BDL (DL: 0.01)       | 0.3 max                          |                                                      |
| 6       | Butachlor                                         | mg/kg  | BDL (DL: 0.01)       | Not Specified                    |                                                      |
| 7       | Chloropyriphos                                    | mg/kg  | BDL (DL: 0.01)       | 0.2 max                          |                                                      |
| 8       | Delta HCH                                         | mg/kg  | BDL (DL: 0.01)       | 0.3 max                          |                                                      |
| 9       | 2,4-Diachlorophenoxyacetic acid                   | mg/kg  | BDL (DL: 0.01)       | Not Specified                    |                                                      |
| 10      | DDT (o, p and p, p – Isomers of DDT, DDE and DDD) | mg/kg  | BDL (DL: 0.01)       | 1.0 max                          |                                                      |
| 11      | Endosulfan (Alpha, Beta and Sulphate)             | mg/kg  | BDL (DL: 0.01)       | 3.0 max                          |                                                      |
| 12      | Ethion                                            | mg/kg  | BDL (DL: 0.01)       | 2.0 max                          |                                                      |
| 13      | Gamma – HCH (Lindane)                             | mg/kg  | BDL (DL: 0.01)       | 0.6 max                          |                                                      |
| 14      | Isoproturon                                       | mg/kg  | BDL (DL: 0.01)       | Not Specified                    |                                                      |
| 15      | Malathion                                         | mg/kg  | BDL (DL: 0.01)       | 1.0 max                          |                                                      |
| 16      | Methyl parathion                                  | mg/kg  | BDL (DL: 0.01)       | 0.2 max                          |                                                      |
| 17      | Monocrotophos                                     | mg/kg  | BDL (DL: 0.01)       | Not specified                    |                                                      |
| 18      | Phorate                                           | mg/kg  | BDL (DL: 0.01)       | Not specified                    |                                                      |

**Note: BDL: Below Detection Limit. DL: Detection Limit.**
